# Supplementary material
Source: Royal Society of Chemistry journal article supplement (doi:10.1039/d6cy00510a)
Supplement: d6cy00510a1.pdf [file d6cy00510a1.pdf]

# Supplementary Information for “Theoretical Insights into Designing $\beta$ -M@Ni(OH)<sub>2</sub> Electrocatalysts for Efficient Urea Oxidation”

Jingwen Zhou and Leanne D. Chen\*

*Electrochemical Technology Centre, Department of Chemistry, University of Guelph,  
Guelph, Ontario N1G 2W1, Canada*

E-mail: [leanne.chen@uoguelph.ca](mailto:leanne.chen@uoguelph.ca)

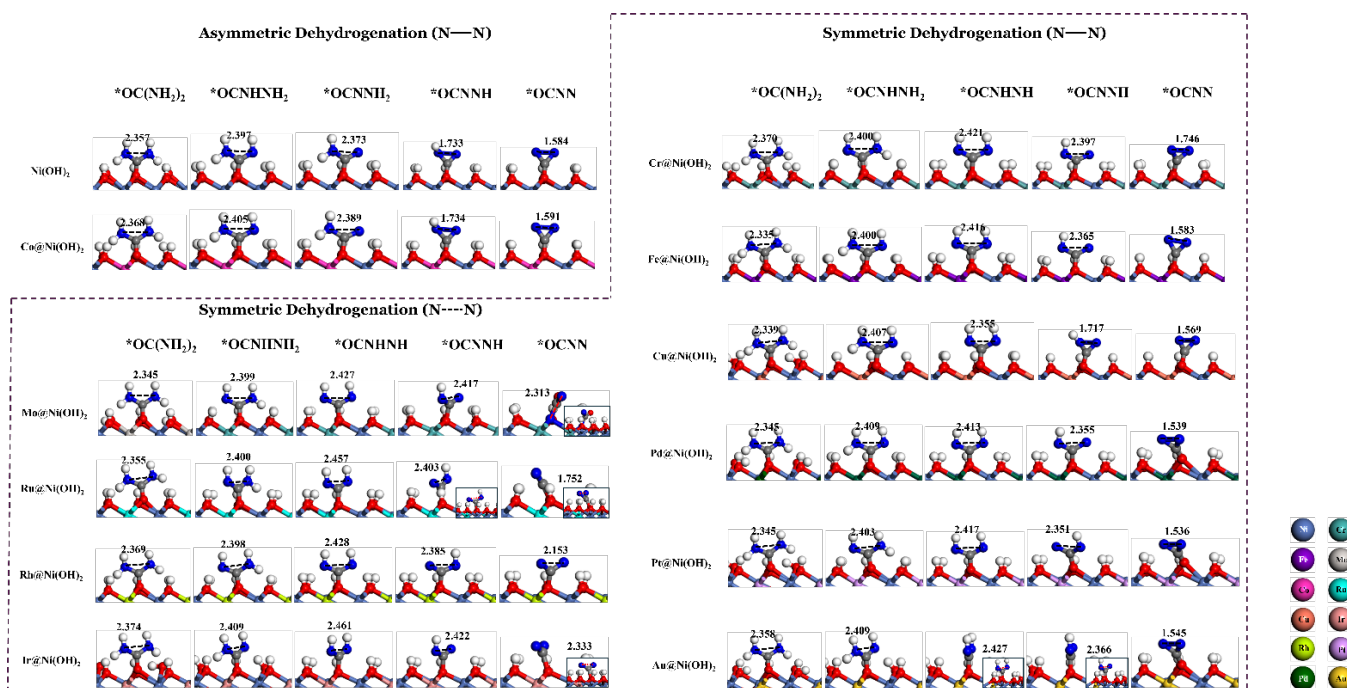

Fig. S1 Four dehydrogenation reaction steps on  $\beta$ -M@Ni(OH)<sub>2</sub>. The inset shows structures rotated by 30° clockwise. The numbers indicate the N—N bond distances (Å).

Optimized fractional coordinates for key intermediates on  $\beta$ -Ni(OH)<sub>2</sub> and  $\beta$ -M@Ni(OH)<sub>2</sub>

(1) \*OCNNH adsorbed on  $\beta$ -Ni(OH)<sub>2</sub>

Ni H O C N

1.0000000000000000

6.3986245000000004 0.0000000000000000 0.0000000000000000

-3.1993122500000006 5.5413713662775024 0.0000000000000000

0.0000000000000000 0.0000000000000000 34.1167642999999998

Ni H O C N

16 32 32 1 2

Selective dynamics

Direct

0.0833332471348029 0.0833332471348029 0.3008666196401251 F F F

0.0833332471348029 0.0833332471348029 0.4336222065467084 F F F

0.0811723178368863 0.0778753853743908 0.5614662652988849 T T T

0.0776352693868776 0.0667470848551583 0.6892099707249698 T T T

0.0833332471348029 0.5833332505730411 0.3008666196401251 F F F

0.0833332471348029 0.5833332505730411 0.4336222065467084 F F F

0.0809424432799499 0.5779440214576766 0.5614248246123620 T T T

0.0775632916603513 0.5773851039171877 0.6872314452563829 T T T

0.5833332505730411 0.0833332471348029 0.3008666196401251 F F F

0.5833332505730411 0.0833332471348029 0.4336222065467084 F F F

0.5812135189275175 0.0779363738935172 0.5613421273993356 T T T

0.5820934747141326 0.0743303789444675 0.6899205095558226 T T T

0.5833332505730411 0.5833332505730411 0.3008666196401251 F F F

0.5833332505730411 0.5833332505730411 0.4336222065467084 F F F

0.5805295099000566 0.5774833734067268 0.5612600925345572 T T T  
0.5895591630972253 0.5789752090789165 0.6881700058687391 T T T  
0.4166667494269589 0.2499997482808780 0.2412107666657235 F F F  
0.4166667494269589 0.2499997482808780 0.3739663535723068 F F F  
0.2499997482808780 0.4166667494269589 0.3605224726145337 F F F  
0.4136886744688945 0.2452107237526177 0.5027453234071161 T T T  
0.2499997482808780 0.4166667494269589 0.4932780595211170 F F F  
0.4098860648040850 0.2394834457583564 0.6314164662002753 T T T  
0.2528925978793493 0.4137088220661636 0.6199812419551856 T T T  
0.4166667494269589 0.7499997517191233 0.2412107666657235 F F F  
0.4166667494269589 0.7499997517191233 0.3739663535723068 F F F  
0.2499997482808780 0.9166667528651971 0.3605224726145337 F F F  
0.4140591639331269 0.7473455650937062 0.5027461235344718 T T T  
0.2499997482808780 0.9166667528651971 0.4932780595211170 F F F  
0.4129209779220676 0.7414616813326025 0.6302765400109069 T T T  
0.2482039314018892 0.9093921346079125 0.6199488960349199 T T T  
0.2393055926965164 0.8888172575237814 0.7465539483721737 T T T  
0.9166667528651971 0.2499997482808780 0.2412107666657235 F F F  
0.9166667528651971 0.2499997482808780 0.3739663535723068 F F F  
0.7499997517191233 0.4166667494269589 0.3605224726145337 F F F  
0.9160276067754615 0.2470053561054265 0.5028509771471974 T T T  
0.7499997517191233 0.4166667494269589 0.4932780595211170 F F F  
0.9219200828625894 0.2412029738607758 0.6310266393541371 T T T  
0.7482966951683792 0.4098181205722954 0.6198646600066893 T T T  
0.7775207426907547 0.4283739420356006 0.7461193985945348 T T T  
0.9166667528651971 0.7499997517191233 0.2412107666657235 F F F

0.9166667528651971 0.7499997517191233 0.3739663535723068 F F F  
0.7499997517191233 0.9166667528651971 0.3605224726145337 F F F  
0.9168055231807054 0.7479976524452675 0.5028509448659307 T T T  
0.7499997517191233 0.9166667528651971 0.4932780595211170 F F F  
0.9151950502834636 0.7474853130379319 0.6286251858304116 T T T  
0.7447528327961949 0.9103231540187189 0.6198981486344731 T T T  
0.7283373271317922 0.8893558064234230 0.7464677603696561 T T T  
0.0776198104717500 0.3133954685951295 0.8052138848810606 T T T  
0.4166667494269589 0.2499997482808780 0.2701955255983037 F F F  
0.2499997482808780 0.4166667494269589 0.3315377136819535 F F F  
0.4166667494269589 0.2499997482808780 0.4029511125048870 F F F  
0.2499997482808780 0.4166667494269589 0.4642933005885368 F F F  
0.4139581151684856 0.2446852991886896 0.5312404384444215 T T T  
0.2482824259199261 0.4108698870861326 0.5915070743537898 T T T  
0.4120127173288394 0.2403693886154964 0.6598989291904933 T T T  
0.4166667494269589 0.7499997517191233 0.2701955255983037 F F F  
0.2499997482808780 0.9166667528651971 0.3315377136819535 F F F  
0.4166667494269589 0.7499997517191233 0.4029511125048870 F F F  
0.2499997482808780 0.9166667528651971 0.4642933005885368 F F F  
0.4139086278234125 0.7449632579237105 0.5312371361218816 T T T  
0.2481268407132033 0.9108569331441855 0.5914735898478294 T T T  
0.4131163327709886 0.7400679441710498 0.6587761993084605 T T T  
0.2459488317572488 0.9040948603942995 0.7182590521389901 T T T  
0.9166667528651971 0.2499997482808780 0.2701955255983037 F F F  
0.7499997517191233 0.4166667494269589 0.3315377136819535 F F F  
0.9166667528651971 0.2499997482808780 0.4029511125048870 F F F

|                    |                    |                    |   |   |   |
|--------------------|--------------------|--------------------|---|---|---|
| 0.7499997517191233 | 0.4166667494269589 | 0.4642933005885368 | F | F | F |
| 0.9151873024255174 | 0.2453415813131858 | 0.5313398084223824 | T | T | T |
| 0.7474341421343219 | 0.4102979399399023 | 0.5913989588975186 | T | T | T |
| 0.9185135605171582 | 0.2407969668078638 | 0.6595160418264205 | T | T | T |
| 0.7540049401443610 | 0.4117156941562519 | 0.7179278286192290 | T | T | T |
| 0.9166667528651971 | 0.7499997517191233 | 0.2701955255983037 | F | F | F |
| 0.7499997517191233 | 0.9166667528651971 | 0.3315377136819535 | F | F | F |
| 0.9166667528651971 | 0.7499997517191233 | 0.4029511125048870 | F | F | F |
| 0.7499997517191233 | 0.9166667528651971 | 0.4642933005885368 | F | F | F |
| 0.9143877520932278 | 0.7451315439009404 | 0.5313420730174061 | T | T | T |
| 0.7471016926102242 | 0.9103544391181952 | 0.5914231192409335 | T | T | T |
| 0.9159759446944092 | 0.7442037171867641 | 0.6570941502803445 | T | T | T |
| 0.7493735187878227 | 0.9084269719488438 | 0.7182479299452600 | T | T | T |
| 0.2577296380828660 | 0.4125934582738449 | 0.7219182147003497 | T | T | T |
| 0.2771766128760807 | 0.4776013825759537 | 0.7581045084906860 | T | T | T |
| 0.1183583699984572 | 0.4619958579214690 | 0.7880667710936375 | T | T | T |
| 0.4299682931118607 | 0.6078145644135534 | 0.7840522384162847 | T | T | T |

**(2) \*OCNN adsorbed on  $\beta$ -Cr@Ni(OH)<sub>2</sub>**

Cr Ni H O C N

1.0000000000000000

6.3986245000000004 0.0000000000000000 0.0000000000000000

-3.1993122500000006 5.5413713662775024 0.0000000000000000

0.0000000000000000 0.0000000000000000 34.1167642999999998

Cr Ni H O C N

1 15 31 32 1 2

Selective dynamics

Direct

|                    |                    |                    |   |   |   |
|--------------------|--------------------|--------------------|---|---|---|
| 0.0756206629542384 | 0.0827544615750180 | 0.6882436322290445 | T | T | T |
| 0.0833332471348029 | 0.0833332471348029 | 0.3008666196401251 | F | F | F |
| 0.0833332471348029 | 0.0833332471348029 | 0.4336222065467084 | F | F | F |
| 0.0790443668874645 | 0.0849305106169070 | 0.5611743129470090 | T | T | T |
| 0.0833332471348029 | 0.5833332505730411 | 0.3008666196401251 | F | F | F |
| 0.0833332471348029 | 0.5833332505730411 | 0.4336222065467084 | F | F | F |
| 0.0791520867358547 | 0.5848331158057203 | 0.5610194200727817 | T | T | T |
| 0.0731248815757317 | 0.5894766126718917 | 0.6906306561694989 | T | T | T |
| 0.5833332505730411 | 0.0833332471348029 | 0.3008666196401251 | F | F | F |
| 0.5833332505730411 | 0.0833332471348029 | 0.4336222065467084 | F | F | F |
| 0.5792257413495052 | 0.0847550561674985 | 0.5610388072866811 | T | T | T |
| 0.5750562022924480 | 0.0861934751356431 | 0.6905799186238881 | T | T | T |
| 0.5833332505730411 | 0.5833332505730411 | 0.3008666196401251 | F | F | F |
| 0.5833332505730411 | 0.5833332505730411 | 0.4336222065467084 | F | F | F |
| 0.5790591001772258 | 0.5851419831345500 | 0.5609934685143267 | T | T | T |
| 0.5832717569414297 | 0.5881920409202926 | 0.6874589714846093 | T | T | T |
| 0.4166667494269589 | 0.2499997482808780 | 0.2412107666657235 | F | F | F |
| 0.4166667494269589 | 0.2499997482808780 | 0.3739663535723068 | F | F | F |
| 0.2499997482808780 | 0.4166667494269589 | 0.3605224726145337 | F | F | F |
| 0.4141359519710494 | 0.2512127463226614 | 0.5026855509360529 | T | T | T |
| 0.2499997482808780 | 0.4166667494269589 | 0.4932780595211170 | F | F | F |
| 0.4017969559646834 | 0.2462160086890030 | 0.6292970886975940 | T | T | T |
| 0.2508937328903087 | 0.4246637472838818 | 0.6198636742132247 | T | T | T |
| 0.4166667494269589 | 0.7499997517191233 | 0.2412107666657235 | F | F | F |

0.4166667494269589 0.7499997517191233 0.3739663535723068 F F F  
0.2499997482808780 0.9166667528651971 0.3605224726145337 F F F  
0.4137119263425827 0.7509276151318288 0.5025057290792587 T T T  
0.2499997482808780 0.9166667528651971 0.4932780595211170 F F F  
0.4007131656823353 0.7537653915741056 0.6315077156249235 T T T  
0.2428437910005860 0.9180768614349505 0.6196961028648622 T T T  
0.2325507985953102 0.9610319814721583 0.7463696447905562 T T T  
0.9166667528651971 0.2499997482808780 0.2412107666657235 F F F  
0.9166667528651971 0.2499997482808780 0.3739663535723068 F F F  
0.7499997517191233 0.4166667494269589 0.3605224726145337 F F F  
0.9150659566507343 0.2512534723075830 0.5026764801015217 T T T  
0.7499997517191233 0.4166667494269589 0.4932780595211170 F F F  
0.9195772167191213 0.2522401816426021 0.6311138493874101 T T T  
0.7435361920561607 0.4160480000623532 0.6198384952708996 T T T  
0.7119164834995413 0.4328381622901779 0.7452119140055979 T T T  
0.9166667528651971 0.7499997517191233 0.2412107666657235 F F F  
0.9166667528651971 0.7499997517191233 0.3739663535723068 F F F  
0.7499997517191233 0.9166667528651971 0.3605224726145337 F F F  
0.9144095675004806 0.7511563954258300 0.5026214308046286 T T T  
0.7499997517191233 0.9166667528651971 0.4932780595211170 F F F  
0.9111708250442545 0.7462420732360543 0.6278077475824889 T T T  
0.7385481360317832 0.9125897062426108 0.6196829020511958 T T T  
0.7555824263106654 0.9088771889225763 0.7465155514051430 T T T  
0.4166667494269589 0.2499997482808780 0.2701955255983037 F F F  
0.2499997482808780 0.4166667494269589 0.3315377136819535 F F F  
0.4166667494269589 0.2499997482808780 0.4029511125048870 F F F

0.2499997482808780 0.4166667494269589 0.4642933005885368 F F F  
0.4125753589479889 0.2518564740080622 0.5311993648199116 T T T  
0.2459434540673717 0.4193294079789611 0.5914020253702882 T T T  
0.4003374846033333 0.2467358282887201 0.6578424129757481 T T T  
0.4166667494269589 0.7499997517191233 0.2701955255983037 F F F  
0.2499997482808780 0.9166667528651971 0.3315377136819535 F F F  
0.4166667494269589 0.7499997517191233 0.4029511125048870 F F F  
0.2499997482808780 0.9166667528651971 0.4642933005885368 F F F  
0.4124800828810675 0.7511073008715126 0.5310186496955283 T T T  
0.2454101476620145 0.9182417262312170 0.5912267403678929 T T T  
0.4060678734120969 0.7522759683057335 0.6599853406939765 T T T  
0.2356656828738550 0.9250301336075546 0.7180788356101714 T T T  
0.9166667528651971 0.2499997482808780 0.2701955255983037 F F F  
0.7499997517191233 0.4166667494269589 0.3315377136819535 F F F  
0.9166667528651971 0.2499997482808780 0.4029511125048870 F F F  
0.7499997517191233 0.4166667494269589 0.4642933005885368 F F F  
0.9136857134413704 0.2515572181474541 0.5311865345904231 T T T  
0.7450259605564957 0.4170807439162054 0.5913640911621644 T T T  
0.9163549253865113 0.2493141906828233 0.6596515736635254 T T T  
0.7442600110491487 0.4179941375425301 0.7172118716003600 T T T  
0.9166667528651971 0.7499997517191233 0.2701955255983037 F F F  
0.7499997517191233 0.9166667528651971 0.3315377136819535 F F F  
0.9166667528651971 0.7499997517191233 0.4029511125048870 F F F  
0.7499997517191233 0.9166667528651971 0.4642933005885368 F F F  
0.9128518326611755 0.7516367171432384 0.5311424200484242 T T T  
0.7443894714941814 0.9177395633366017 0.5912299518765912 T T T

|                    |                    |                    |   |   |   |
|--------------------|--------------------|--------------------|---|---|---|
| 0.9120498874484232 | 0.7512170356765477 | 0.6563107729383308 | T | T | T |
| 0.7536910298337436 | 0.9219740184510113 | 0.7181018432751977 | T | T | T |
| 0.2502648843871021 | 0.4183274670864042 | 0.7211903452108422 | T | T | T |
| 0.3083588240593204 | 0.3753446560479103 | 0.7563856016699385 | T | T | T |
| 0.2274974974820803 | 0.1947525170029493 | 0.7811364238513455 | T | T | T |
| 0.4968678892131785 | 0.4707337021123336 | 0.7796276883086745 | T | T | T |

**(3) \*OCNHNH adsorbed on  $\beta$ -Fe@Ni(OH)<sub>2</sub>**

Fe Ni H O C N

1.0000000000000000

6.3986245000000004 0.0000000000000000 0.0000000000000000

-3.1993122500000006 5.5413713662775024 0.0000000000000000

0.0000000000000000 0.0000000000000000 34.1167642999999998

Fe Ni H O C N

1 15 33 32 1 2

Selective dynamics

Direct

|                    |                    |                    |   |   |   |
|--------------------|--------------------|--------------------|---|---|---|
| 0.0814796660396708 | 0.0719174946388313 | 0.6918855137780422 | T | T | T |
| 0.0833332471348029 | 0.0833332471348029 | 0.3008666196401251 | F | F | F |
| 0.0833332471348029 | 0.0833332471348029 | 0.4336222065467084 | F | F | F |
| 0.0825189277266858 | 0.0776462411835625 | 0.5615523849977945 | T | T | T |
| 0.0833332471348029 | 0.5833332505730411 | 0.3008666196401251 | F | F | F |
| 0.0833332471348029 | 0.5833332505730411 | 0.4336222065467084 | F | F | F |
| 0.0820758722563699 | 0.5776219716738270 | 0.5615100912207357 | T | T | T |
| 0.0823270879715813 | 0.5735819108988528 | 0.6873821183221686 | T | T | T |
| 0.5833332505730411 | 0.0833332471348029 | 0.3008666196401251 | F | F | F |

0.5833332505730411 0.0833332471348029 0.4336222065467084 F F F  
0.5823887775820121 0.0782975925303906 0.5614864815732393 T T T  
0.5880680827334560 0.0730963501148403 0.6896671499776105 T T T  
0.5833332505730411 0.5833332505730411 0.3008666196401251 F F F  
0.5833332505730411 0.5833332505730411 0.4336222065467084 F F F  
0.5820932355675696 0.5779987906268002 0.5614786391980993 T T T  
0.5908391310891749 0.5759217474451866 0.6899360620777891 T T T  
0.4166667494269589 0.2499997482808780 0.2412107666657235 F F F  
0.4166667494269589 0.2499997482808780 0.3739663535723068 F F F  
0.2499997482808780 0.4166667494269589 0.3605224726145337 F F F  
0.4158934628079938 0.2476073677005911 0.5029490228445934 T T T  
0.2499997482808780 0.4166667494269589 0.4932780595211170 F F F  
0.4082018070837514 0.2441240207988120 0.6319333627885723 T T T  
0.2534914867587623 0.4193117164211130 0.6200372694738264 T T T  
0.4166667494269589 0.7499997517191233 0.2412107666657235 F F F  
0.4166667494269589 0.7499997517191233 0.3739663535723068 F F F  
0.2499997482808780 0.9166667528651971 0.3605224726145337 F F F  
0.4151157540260313 0.7467730546701165 0.5028026791175113 T T T  
0.2499997482808780 0.9166667528651971 0.4932780595211170 F F F  
0.4119507716656269 0.7435627613837775 0.6306764475723377 T T T  
0.2488779783639295 0.9126630732306352 0.6200049519226307 T T T  
0.2493375291165469 0.8926082289048779 0.7471884088972499 T T T  
0.9166667528651971 0.2499997482808780 0.2412107666657235 F F F  
0.9166667528651971 0.2499997482808780 0.3739663535723068 F F F  
0.7499997517191233 0.4166667494269589 0.3605224726145337 F F F  
0.9166274885589529 0.2464113637380046 0.5029713770083859 T T T

|                    |                    |                    |   |   |   |
|--------------------|--------------------|--------------------|---|---|---|
| 0.7499997517191233 | 0.4166667494269589 | 0.4932780595211170 | F | F | F |
| 0.9284997727900844 | 0.2267131083156032 | 0.6299957060648587 | T | T | T |
| 0.7535124294329353 | 0.4057053906950602 | 0.6202118873215889 | T | T | T |
| 0.8083491289308491 | 0.3943714368761094 | 0.7434474789970636 | T | T | T |
| 0.9166667528651971 | 0.7499997517191233 | 0.2412107666657235 | F | F | F |
| 0.9166667528651971 | 0.7499997517191233 | 0.3739663535723068 | F | F | F |
| 0.7499997517191233 | 0.9166667528651971 | 0.3605224726145337 | F | F | F |
| 0.9158911186055989 | 0.7469055148117467 | 0.5030177264251990 | T | T | T |
| 0.7499997517191233 | 0.9166667528651971 | 0.4932780595211170 | F | F | F |
| 0.9190880835088882 | 0.7473081852725593 | 0.6294249829778957 | T | T | T |
| 0.7404578958026554 | 0.9021094058036890 | 0.6199679243804820 | T | T | T |
| 0.6996821426920259 | 0.8467882739302018 | 0.7451699355106303 | T | T | T |
| 0.0549613350052347 | 0.4143192928014857 | 0.8059678842170837 | T | T | T |
| 0.4493060847630924 | 0.6309461102194636 | 0.8056821744685069 | T | T | T |
| 0.4166667494269589 | 0.2499997482808780 | 0.2701955255983037 | F | F | F |
| 0.2499997482808780 | 0.4166667494269589 | 0.3315377136819535 | F | F | F |
| 0.4166667494269589 | 0.2499997482808780 | 0.4029511125048870 | F | F | F |
| 0.2499997482808780 | 0.4166667494269589 | 0.4642933005885368 | F | F | F |
| 0.4154999053024746 | 0.2455189490933296 | 0.5314499181709792 | T | T | T |
| 0.2498873670114235 | 0.4114048769578723 | 0.5915782038755469 | T | T | T |
| 0.4081961315501322 | 0.2381328371171218 | 0.6604003940498143 | T | T | T |
| 0.4166667494269589 | 0.7499997517191233 | 0.2701955255983037 | F | F | F |
| 0.2499997482808780 | 0.9166667528651971 | 0.3315377136819535 | F | F | F |
| 0.4166667494269589 | 0.7499997517191233 | 0.4029511125048870 | F | F | F |
| 0.2499997482808780 | 0.9166667528651971 | 0.4642933005885368 | F | F | F |
| 0.4148608651481778 | 0.7452187663110906 | 0.5313005487875488 | T | T | T |

|                    |                    |                    |   |   |   |
|--------------------|--------------------|--------------------|---|---|---|
| 0.2496852070317031 | 0.9112150161096975 | 0.5915257147366892 | T | T | T |
| 0.4150081912539891 | 0.7385782064729015 | 0.6591172577881476 | T | T | T |
| 0.2502859815004167 | 0.9092488531710364 | 0.7189696228073645 | T | T | T |
| 0.9166667528651971 | 0.2499997482808780 | 0.2701955255983037 | F | F | F |
| 0.7499997517191233 | 0.4166667494269589 | 0.3315377136819535 | F | F | F |
| 0.9166667528651971 | 0.2499997482808780 | 0.4029511125048870 | F | F | F |
| 0.7499997517191233 | 0.4166667494269589 | 0.4642933005885368 | F | F | F |
| 0.9162791631587773 | 0.2449056960652889 | 0.5314740454221515 | T | T | T |
| 0.7493774354941388 | 0.4100572841450173 | 0.5917686684661262 | T | T | T |
| 0.9255441516694188 | 0.2331035631066790 | 0.6584441351548661 | T | T | T |
| 0.7598690646974064 | 0.4047536032410930 | 0.7163044906499371 | T | T | T |
| 0.9166667528651971 | 0.7499997517191233 | 0.2701955255983037 | F | F | F |
| 0.7499997517191233 | 0.9166667528651971 | 0.3315377136819535 | F | F | F |
| 0.9166667528651971 | 0.7499997517191233 | 0.4029511125048870 | F | F | F |
| 0.7499997517191233 | 0.9166667528651971 | 0.4642933005885368 | F | F | F |
| 0.9156261409632726 | 0.7451432166478573 | 0.5315190423887408 | T | T | T |
| 0.7477343703694024 | 0.9096428780971619 | 0.5915170446480403 | T | T | T |
| 0.9222410831490204 | 0.7490304848943310 | 0.6579084634823429 | T | T | T |
| 0.7556506555562661 | 0.9068534617541206 | 0.7180982100286607 | T | T | T |
| 0.2572845539921961 | 0.4126267158253066 | 0.7216208429344008 | T | T | T |
| 0.2541832609376147 | 0.4642132943988643 | 0.7603070037371329 | T | T | T |
| 0.0349370908540418 | 0.3743139831973349 | 0.7766220533518289 | T | T | T |
| 0.4703240550599027 | 0.6125434426978199 | 0.7763344329199537 | T | T | T |

**(4) \*OCNN adsorbed on  $\beta$ -Co@Ni(OH)<sub>2</sub>**

Co Ni H O C N

1.0000000000000000

6.3986245000000004 0.0000000000000000 0.0000000000000000  
-3.1993122500000006 5.5413713662775024 0.0000000000000000  
0.0000000000000000 0.0000000000000000 34.1167642999999998

Co Ni H O C N

1 15 31 32 1 2

### Selective dynamics

#### Direct

0.0776035716727948 0.0752845310806540 0.6871231380011632 T T T  
0.0833332471348029 0.0833332471348029 0.3008666196401251 F F F  
0.0833332471348029 0.0833332471348029 0.4336222065467084 F F F  
0.0826442405208822 0.0837003377180208 0.5606599656188983 T T T  
0.0833332471348029 0.5833332505730411 0.3008666196401251 F F F  
0.0833332471348029 0.5833332505730411 0.4336222065467084 F F F  
0.0827327113621353 0.5833772874148150 0.5607093998576234 T T T  
0.0778755461284330 0.5855503877510477 0.6864439301361804 T T T  
0.5833332505730411 0.0833332471348029 0.3008666196401251 F F F  
0.5833332505730411 0.0833332471348029 0.4336222065467084 F F F  
0.5824575274597680 0.0834038162927183 0.5605628322881882 T T T  
0.5826010094688400 0.0824273129493794 0.6887229984519335 T T T  
0.5833332505730411 0.5833332505730411 0.3008666196401251 F F F  
0.5833332505730411 0.5833332505730411 0.4336222065467084 F F F  
0.5823127460405002 0.5834290565405021 0.5606599143134309 T T T  
0.5897509165799510 0.5863718691008709 0.6870188938168600 T T T  
0.4166667494269589 0.2499997482808780 0.2412107666657235 F F F  
0.4166667494269589 0.2499997482808780 0.3739663535723068 F F F

0.2499997482808780 0.4166667494269589 0.3605224726145337 F F F  
0.4160065924677881 0.2504185683008569 0.5020500503813802 T T T  
0.2499997482808780 0.4166667494269589 0.4932780595211170 F F F  
0.4190578048570678 0.2489592888023102 0.6294546203914388 T T T  
0.2497414435661829 0.4142927908611369 0.6192485317140024 T T T  
0.4166667494269589 0.7499997517191233 0.2412107666657235 F F F  
0.4166667494269589 0.7499997517191233 0.3739663535723068 F F F  
0.2499997482808780 0.9166667528651971 0.3605224726145337 F F F  
0.4157701054898035 0.7493011108051630 0.5020242210956812 T T T  
0.2499997482808780 0.9166667528651971 0.4932780595211170 F F F  
0.4126573268387295 0.7472921685341235 0.6295437217875076 T T T  
0.2503621456346571 0.9180067599151023 0.6191534443873739 T T T  
0.2383562936129481 0.9050379114514063 0.7455630875695949 T T T  
0.9166667528651971 0.2499997482808780 0.2412107666657235 F F F  
0.9166667528651971 0.2499997482808780 0.3739663535723068 F F F  
0.7499997517191233 0.4166667494269589 0.3605224726145337 F F F  
0.9169244995642579 0.2505553353224887 0.5020647564683735 T T T  
0.7499997517191233 0.4166667494269589 0.4932780595211170 F F F  
0.9173458754550654 0.2525958159587153 0.6294182203873928 T T T  
0.7477813267139258 0.4157995458515696 0.6192745632272267 T T T  
0.7578604916424202 0.4247247233106571 0.7453835962174052 T T T  
0.9166667528651971 0.7499997517191233 0.2412107666657235 F F F  
0.9166667528651971 0.7499997517191233 0.3739663535723068 F F F  
0.7499997517191233 0.9166667528651971 0.3605224726145337 F F F  
0.9162760673454228 0.7501655000261994 0.5021692964998000 T T T  
0.7499997517191233 0.9166667528651971 0.4932780595211170 F F F

|                    |                    |                    |   |   |   |
|--------------------|--------------------|--------------------|---|---|---|
| 0.9150440552650388 | 0.7484393127604914 | 0.6274646423467849 | T | T | T |
| 0.7483416596981524 | 0.9175427534017152 | 0.6191308266788790 | T | T | T |
| 0.7430157112340049 | 0.9080374905095919 | 0.7457672981265215 | T | T | T |
| 0.4166667494269589 | 0.2499997482808780 | 0.2701955255983037 | F | F | F |
| 0.2499997482808780 | 0.4166667494269589 | 0.3315377136819535 | F | F | F |
| 0.4166667494269589 | 0.2499997482808780 | 0.4029511125048870 | F | F | F |
| 0.2499997482808780 | 0.4166667494269589 | 0.4642933005885368 | F | F | F |
| 0.4158750355790177 | 0.2502952077480644 | 0.5305501630049733 | T | T | T |
| 0.2492896692149807 | 0.4166807816425929 | 0.5907738239881501 | T | T | T |
| 0.4154943064822187 | 0.2488501114707834 | 0.6579262518644331 | T | T | T |
| 0.4166667494269589 | 0.7499997517191233 | 0.2701955255983037 | F | F | F |
| 0.2499997482808780 | 0.9166667528651971 | 0.3315377136819535 | F | F | F |
| 0.4166667494269589 | 0.7499997517191233 | 0.4029511125048870 | F | F | F |
| 0.2499997482808780 | 0.9166667528651971 | 0.4642933005885368 | F | F | F |
| 0.4156698954303734 | 0.7496425965266630 | 0.5305263269408804 | T | T | T |
| 0.2496406869180860 | 0.9169551036342086 | 0.5906794610684428 | T | T | T |
| 0.4138755757120046 | 0.7482232206086067 | 0.6580223011273268 | T | T | T |
| 0.2449578463253189 | 0.9139573214346673 | 0.7172122179939414 | T | T | T |
| 0.9166667528651971 | 0.2499997482808780 | 0.2701955255983037 | F | F | F |
| 0.7499997517191233 | 0.4166667494269589 | 0.3315377136819535 | F | F | F |
| 0.9166667528651971 | 0.2499997482808780 | 0.4029511125048870 | F | F | F |
| 0.7499997517191233 | 0.4166667494269589 | 0.4642933005885368 | F | F | F |
| 0.9163855759676304 | 0.2504127523486598 | 0.5305661307688183 | T | T | T |
| 0.7489274663136073 | 0.4163684923097275 | 0.5907972261658109 | T | T | T |
| 0.9186971760638626 | 0.2495407823365206 | 0.6579006642534541 | T | T | T |
| 0.7518329800027712 | 0.4171551203588444 | 0.7169943645501174 | T | T | T |

|                    |                    |                    |   |   |   |
|--------------------|--------------------|--------------------|---|---|---|
| 0.9166667528651971 | 0.7499997517191233 | 0.2701955255983037 | F | F | F |
| 0.7499997517191233 | 0.9166667528651971 | 0.3315377136819535 | F | F | F |
| 0.9166667528651971 | 0.7499997517191233 | 0.4029511125048870 | F | F | F |
| 0.7499997517191233 | 0.9166667528651971 | 0.4642933005885368 | F | F | F |
| 0.9160107731289499 | 0.7500496245281822 | 0.5306703030986678 | T | T | T |
| 0.7487446998334187 | 0.9169247647074282 | 0.5906666668856612 | T | T | T |
| 0.9170061142435810 | 0.7503025996449491 | 0.6559520807698360 | T | T | T |
| 0.7483587711321554 | 0.9153730697157318 | 0.7173712509962458 | T | T | T |
| 0.2537551125809749 | 0.4141978921056398 | 0.7191171434242087 | T | T | T |
| 0.2610989204811310 | 0.4264348686495678 | 0.7568266194330054 | T | T | T |
| 0.1253073598792698 | 0.3516079118038320 | 0.7887214940981789 | T | T | T |
| 0.4100696937521851 | 0.5236877288162424 | 0.7868642677903959 | T | T | T |

(5) \*OCNHNH adsorbed on  $\beta$ -Cu@Ni(OH)<sub>2</sub>

Cu Ni H O C N

1.0000000000000000

6.3986245000000004 0.0000000000000000 0.0000000000000000

-3.1993122500000006 5.5413713662775024 0.0000000000000000

0.0000000000000000 0.0000000000000000 34.1167642999999998

Cu Ni H O C N

1 15 33 32 1 2

Selective dynamics

Direct

0.0869182990721575 0.0855703535611179 0.6897639561244239 T T T

0.0833332471348029 0.0833332471348029 0.3008666196401251 F F F

0.0833332471348029 0.0833332471348029 0.4336222065467084 F F F  
0.0829310104386810 0.0754288041268566 0.5612504129158540 T T T  
0.0833332471348029 0.5833332505730411 0.3008666196401251 F F F  
0.0833332471348029 0.5833332505730411 0.4336222065467084 F F F  
0.0854479121422226 0.5781459298774139 0.5613265727640447 T T T  
0.0842841952285918 0.5936655044908153 0.6871010818469673 T T T  
0.5833332505730411 0.0833332471348029 0.3008666196401251 F F F  
0.5833332505730411 0.0833332471348029 0.4336222065467084 F F F  
0.5844530988698828 0.0788101998864750 0.5613801460761657 T T T  
0.5879379612304501 0.0861835745832105 0.6907992065594326 T T T  
0.5833332505730411 0.5833332505730411 0.3008666196401251 F F F  
0.5833332505730411 0.5833332505730411 0.4336222065467084 F F F  
0.5828888109195217 0.5782301354251322 0.5612881947316551 T T T  
0.5981326551849225 0.5946620485052476 0.6879466230886995 T T T  
0.4166667494269589 0.2499997482808780 0.2412107666657235 F F F  
0.4166667494269589 0.2499997482808780 0.3739663535723068 F F F  
0.2499997482808780 0.4166667494269589 0.3605224726145337 F F F  
0.4157968461245692 0.2473294283637681 0.5029035523434402 T T T  
0.2499997482808780 0.4166667494269589 0.4932780595211170 F F F  
0.3890401908334306 0.2437613405265835 0.6330214892412622 T T T  
0.2691694826012842 0.4499735370411846 0.6197332424433513 T T T  
0.4166667494269589 0.7499997517191233 0.2412107666657235 F F F  
0.4166667494269589 0.7499997517191233 0.3739663535723068 F F F  
0.2499997482808780 0.9166667528651971 0.3605224726145337 F F F  
0.4182942776721292 0.7500336749038190 0.5027339331653214 T T T  
0.2499997482808780 0.9166667528651971 0.4932780595211170 F F F

0.4431948938818461 0.7911318341222535 0.6310176837580560 T T T  
0.2185530965364276 0.8996948075444844 0.6193188551360383 T T T  
0.2080557186196232 0.8800864146794737 0.7448278106974489 T T T  
0.9166667528651971 0.2499997482808780 0.2412107666657235 F F F  
0.9166667528651971 0.2499997482808780 0.3739663535723068 F F F  
0.7499997517191233 0.4166667494269589 0.3605224726145337 F F F  
0.9192857691653962 0.2473047788178420 0.5029356610656949 T T T  
0.7499997517191233 0.4166667494269589 0.4932780595211170 F F F  
0.9429571067799367 0.2376897160856236 0.6326349645761095 T T T  
0.7329591172769988 0.3715019448402972 0.6197101592082952 T T T  
0.7813449812118424 0.4438027804898659 0.7452109816888319 T T T  
0.9166667528651971 0.7499997517191233 0.2412107666657235 F F F  
0.9166667528651971 0.7499997517191233 0.3739663535723068 F F F  
0.7499997517191233 0.9166667528651971 0.3605224726145337 F F F  
0.9154094894530767 0.7423091129739525 0.5027805867272875 T T T  
0.7499997517191233 0.9166667528651971 0.4932780595211170 F F F  
0.8841565996915016 0.6807447573760990 0.6271593156810845 T T T  
0.7734359107228074 0.8978096958997582 0.6192984170213780 T T T  
0.7548606476208976 0.8805796133643512 0.7451306619330371 T T T  
0.1275990029195060 0.5321281739513837 0.8086268065348399 T T T  
0.4764305093287213 0.5522431909426390 0.8097938628198801 T T T  
0.4166667494269589 0.2499997482808780 0.2701955255983037 F F F  
0.2499997482808780 0.4166667494269589 0.3315377136819535 F F F  
0.4166667494269589 0.2499997482808780 0.4029511125048870 F F F  
0.2499997482808780 0.4166667494269589 0.4642933005885368 F F F  
0.4156701796536563 0.2454794793768076 0.5314066428122922 T T T

0.2534446837830130 0.4159713275204951 0.5917761427669430 T T T  
0.4059801018629376 0.2488564110596824 0.6614092229490933 T T T  
0.4166667494269589 0.7499997517191233 0.2701955255983037 F F F  
0.2499997482808780 0.9166667528651971 0.3315377136819535 F F F  
0.4166667494269589 0.7499997517191233 0.4029511125048870 F F F  
0.2499997482808780 0.9166667528651971 0.4642933005885368 F F F  
0.4185593105682749 0.7473232226507984 0.5312279435378227 T T T  
0.2488426936904884 0.9112592120226102 0.5912166061752077 T T T  
0.4260423741777569 0.7624182117769419 0.6591587000164542 T T T  
0.2435933530124406 0.9280672164427628 0.7174639690174160 T T T  
0.9166667528651971 0.2499997482808780 0.2701955255983037 F F F  
0.7499997517191233 0.4166667494269589 0.3315377136819535 F F F  
0.9166667528651971 0.2499997482808780 0.4029511125048870 F F F  
0.7499997517191233 0.4166667494269589 0.4642933005885368 F F F  
0.9193995445773980 0.2452924184981040 0.5314329304256363 T T T  
0.7482754256960720 0.4058247382070161 0.5917793933048784 T T T  
0.9315850076159683 0.2471379158114753 0.6609588684936949 T T T  
0.7547688670124750 0.4191425349970933 0.7171295909079028 T T T  
0.9166667528651971 0.7499997517191233 0.2701955255983037 F F F  
0.7499997517191233 0.9166667528651971 0.3315377136819535 F F F  
0.9166667528651971 0.7499997517191233 0.4029511125048870 F F F  
0.7499997517191233 0.9166667528651971 0.4642933005885368 F F F  
0.9153517661538740 0.7409700002758344 0.5312811070743055 T T T  
0.7528055159920801 0.9110838015538713 0.5912851455869277 T T T  
0.9121348437114165 0.7375782603479133 0.6541949255907661 T T T  
0.7725850537220991 0.9289293776136596 0.7176835914381722 T T T

|                    |                    |                    |   |   |   |
|--------------------|--------------------|--------------------|---|---|---|
| 0.2795377345253692 | 0.4737947346236367 | 0.7237785959553221 | T | T | T |
| 0.2977540261336865 | 0.5211458744505147 | 0.7611939474773466 | T | T | T |
| 0.1279093371750409 | 0.5564395895105657 | 0.7788877368376765 | T | T | T |
| 0.5055875129919722 | 0.5765778944995348 | 0.7800957041374683 | T | T | T |

**(6) \*OCNN adsorbed on  $\beta$ -Mo@Ni(OH)<sub>2</sub>**

Mo Ni H O C N

1.0000000000000000

6.3986245000000004 0.0000000000000000 0.0000000000000000

-3.1993122500000006 5.5413713662775024 0.0000000000000000

0.0000000000000000 0.0000000000000000 34.1167642999999998

Mo Ni H O C N

1 15 31 32 1 2

Selective dynamics

Direct

|                    |                    |                    |   |   |   |
|--------------------|--------------------|--------------------|---|---|---|
| 0.0877191060487309 | 0.0777588381327238 | 0.6936429203371628 | T | T | T |
| 0.0833332471348029 | 0.0833332471348029 | 0.3008666196401251 | F | F | F |
| 0.0833332471348029 | 0.0833332471348029 | 0.4336222065467084 | F | F | F |
| 0.0808156195213976 | 0.0713693249114953 | 0.5615294499373631 | T | T | T |
| 0.0833332471348029 | 0.5833332505730411 | 0.3008666196401251 | F | F | F |
| 0.0833332471348029 | 0.5833332505730411 | 0.4336222065467084 | F | F | F |
| 0.0809061888841449 | 0.5717447834906940 | 0.5610275665433567 | T | T | T |
| 0.0870818797723183 | 0.5632114999568322 | 0.6929178745784674 | T | T | T |
| 0.5833332505730411 | 0.0833332471348029 | 0.3008666196401251 | F | F | F |
| 0.5833332505730411 | 0.0833332471348029 | 0.4336222065467084 | F | F | F |
| 0.5816067947803938 | 0.0724394117389036 | 0.5613210590295550 | T | T | T |

0.5787211500791131 0.0633078869779807 0.6891989124334331 T T T  
0.5833332505730411 0.5833332505730411 0.3008666196401251 F F F  
0.5833332505730411 0.5833332505730411 0.4336222065467084 F F F  
0.5812257392922482 0.5721115870240464 0.5613609382987230 T T T  
0.5798326667744048 0.5630543416603251 0.6884102328376370 T T T  
0.4166667494269589 0.2499997482808780 0.2412107666657235 F F F  
0.4166667494269589 0.2499997482808780 0.3739663535723068 F F F  
0.2499997482808780 0.4166667494269589 0.3605224726145337 F F F  
0.4139941658596815 0.2432194293513683 0.5029670240634252 T T T  
0.2499997482808780 0.4166667494269589 0.4932780595211170 F F F  
0.3856754065816683 0.2126116541515099 0.6293201139766407 T T T  
0.2511905125487222 0.4184505733998777 0.6202217585454933 T T T  
0.4166667494269589 0.7499997517191233 0.2412107666657235 F F F  
0.4166667494269589 0.7499997517191233 0.3739663535723068 F F F  
0.2499997482808780 0.9166667528651971 0.3605224726145337 F F F  
0.4169338368593231 0.7436961421531775 0.5025873928676022 T T T  
0.2499997482808780 0.9166667528651971 0.4932780595211170 F F F  
0.4204138772506230 0.7423866771159249 0.6296416143436854 T T T  
0.2442660663203421 0.8889696267722662 0.6195946369643327 T T T  
0.2755745337159464 0.8714901759323255 0.7472535091616344 T T T  
0.9166667528651971 0.2499997482808780 0.2412107666657235 F F F  
0.9166667528651971 0.2499997482808780 0.3739663535723068 F F F  
0.7499997517191233 0.4166667494269589 0.3605224726145337 F F F  
0.9163417311796966 0.2422898635513876 0.5027943174466670 T T T  
0.7499997517191233 0.4166667494269589 0.4932780595211170 F F F  
0.9175812492933945 0.2164117355911807 0.6303764567069711 T T T

|                    |                    |                    |   |   |   |
|--------------------|--------------------|--------------------|---|---|---|
| 0.7482066421726431 | 0.4006117676063195 | 0.6198305758230047 | T | T | T |
| 0.6867668132138869 | 0.3721355254961142 | 0.7450901982287871 | T | T | T |
| 0.9166667528651971 | 0.7499997517191233 | 0.2412107666657235 | F | F | F |
| 0.9166667528651971 | 0.7499997517191233 | 0.3739663535723068 | F | F | F |
| 0.7499997517191233 | 0.9166667528651971 | 0.3605224726145337 | F | F | F |
| 0.9151248972515558 | 0.7445729570517212 | 0.5026127149434808 | T | T | T |
| 0.7499997517191233 | 0.9166667528651971 | 0.4932780595211170 | F | F | F |
| 0.9182680524910667 | 0.7471418468383441 | 0.6300222914131690 | T | T | T |
| 0.7393447850363539 | 0.8960114541963304 | 0.6197691937832055 | T | T | T |
| 0.7150074856632970 | 0.8829575069607374 | 0.7481794603511317 | T | T | T |
| 0.4166667494269589 | 0.2499997482808780 | 0.2701955255983037 | F | F | F |
| 0.2499997482808780 | 0.4166667494269589 | 0.3315377136819535 | F | F | F |
| 0.4166667494269589 | 0.2499997482808780 | 0.4029511125048870 | F | F | F |
| 0.2499997482808780 | 0.4166667494269589 | 0.4642933005885368 | F | F | F |
| 0.4140751532540006 | 0.2401443274255092 | 0.5314732879135481 | T | T | T |
| 0.2471779266972309 | 0.4047455670921065 | 0.5918194397415458 | T | T | T |
| 0.4035398342040021 | 0.2143900229956087 | 0.6576789142426278 | T | T | T |
| 0.4166667494269589 | 0.7499997517191233 | 0.2701955255983037 | F | F | F |
| 0.2499997482808780 | 0.9166667528651971 | 0.3315377136819535 | F | F | F |
| 0.4166667494269589 | 0.7499997517191233 | 0.4029511125048870 | F | F | F |
| 0.2499997482808780 | 0.9166667528651971 | 0.4642933005885368 | F | F | F |
| 0.4154712044783065 | 0.7402470050492479 | 0.5310900674118375 | T | T | T |
| 0.2476042471707203 | 0.9023885340867205 | 0.5911664425478309 | T | T | T |
| 0.4236772100602158 | 0.7420521189501929 | 0.6580811807675978 | T | T | T |
| 0.2586588085317601 | 0.9077478027945112 | 0.7196896834658960 | T | T | T |
| 0.9166667528651971 | 0.2499997482808780 | 0.2701955255983037 | F | F | F |

|                    |                    |                    |   |   |   |
|--------------------|--------------------|--------------------|---|---|---|
| 0.7499997517191233 | 0.4166667494269589 | 0.3315377136819535 | F | F | F |
| 0.9166667528651971 | 0.2499997482808780 | 0.4029511125048870 | F | F | F |
| 0.7499997517191233 | 0.4166667494269589 | 0.4642933005885368 | F | F | F |
| 0.9151109151756688 | 0.2395760797252569 | 0.5313025659033935 | T | T | T |
| 0.7476811822347363 | 0.4044732568047135 | 0.5913523793172619 | T | T | T |
| 0.9044559749149187 | 0.2190294803970627 | 0.6587608785969792 | T | T | T |
| 0.7335072451702158 | 0.3856588400418945 | 0.7173732441709636 | T | T | T |
| 0.9166667528651971 | 0.7499997517191233 | 0.2701955255983037 | F | F | F |
| 0.7499997517191233 | 0.9166667528651971 | 0.3315377136819535 | F | F | F |
| 0.9166667528651971 | 0.7499997517191233 | 0.4029511125048870 | F | F | F |
| 0.7499997517191233 | 0.9166667528651971 | 0.4642933005885368 | F | F | F |
| 0.9145278882226119 | 0.7403110177744141 | 0.5311034042191118 | T | T | T |
| 0.7478306945849283 | 0.9037923440531076 | 0.5912846433450549 | T | T | T |
| 0.9244697325757093 | 0.7467849345478955 | 0.6585065231826508 | T | T | T |
| 0.7497054853831493 | 0.9084580474129470 | 0.7201285569452217 | T | T | T |
| 0.3554140753128173 | 0.6596340934925895 | 0.7747915389678245 | T | T | T |
| 0.3274784411864788 | 0.4652253708855053 | 0.7595652062342607 | T | T | T |
| 0.2327963188815493 | 0.3910614329120782 | 0.7216182187058082 | T | T | T |
| 0.4033697586439024 | 0.3254385437325316 | 0.7766328560812265 | T | T | T |

**(7) \*OCNNH adsorbed on  $\beta$ -Ru@Ni(OH)<sub>2</sub>**

Ru Ni H O C N

1.0000000000000000

6.3986245000000004 0.0000000000000000 0.0000000000000000

-3.1993122500000006 5.5413713662775024 0.0000000000000000

0.0000000000000000 0.0000000000000000 34.1167642999999998

Ru Ni H O C N

1 15 32 32 1 2

Selective dynamics

Direct

|                    |                    |                    |   |   |   |
|--------------------|--------------------|--------------------|---|---|---|
| 0.0849232107723257 | 0.0825689648057230 | 0.6871957517175024 | T | T | T |
| 0.0833332471348029 | 0.0833332471348029 | 0.3008666196401251 | F | F | F |
| 0.0833332471348029 | 0.0833332471348029 | 0.4336222065467084 | F | F | F |
| 0.0856709686399904 | 0.0845630353283947 | 0.5617582981151052 | T | T | T |
| 0.0833332471348029 | 0.5833332505730411 | 0.3008666196401251 | F | F | F |
| 0.0833332471348029 | 0.5833332505730411 | 0.4336222065467084 | F | F | F |
| 0.0854488222878119 | 0.5842570165830067 | 0.5614097968322703 | T | T | T |
| 0.0870369605259901 | 0.5865672290899403 | 0.6902277228063809 | T | T | T |
| 0.5833332505730411 | 0.0833332471348029 | 0.3008666196401251 | F | F | F |
| 0.5833332505730411 | 0.0833332471348029 | 0.4336222065467084 | F | F | F |
| 0.5853685456149640 | 0.0837775390442058 | 0.5614516540599849 | T | T | T |
| 0.5867216636370485 | 0.0861069806357169 | 0.6906449170108567 | T | T | T |
| 0.5833332505730411 | 0.5833332505730411 | 0.3008666196401251 | F | F | F |
| 0.5833332505730411 | 0.5833332505730411 | 0.4336222065467084 | F | F | F |
| 0.5853854780554395 | 0.5841037670050940 | 0.5614185990633742 | T | T | T |
| 0.5875080226622333 | 0.5863703892376274 | 0.6902605546725156 | T | T | T |
| 0.4166667494269589 | 0.2499997482808780 | 0.2412107666657235 | F | F | F |
| 0.4166667494269589 | 0.2499997482808780 | 0.3739663535723068 | F | F | F |
| 0.2499997482808780 | 0.4166667494269589 | 0.3605224726145337 | F | F | F |
| 0.4174583589213208 | 0.2497940238482419 | 0.5029613960087470 | T | T | T |
| 0.2499997482808780 | 0.4166667494269589 | 0.4932780595211170 | F | F | F |

|                    |                     |                    |   |   |   |
|--------------------|---------------------|--------------------|---|---|---|
| 0.4135748335933672 | 0.2427117783053390  | 0.6296265217435111 | T | T | T |
| 0.2552862659837257 | 0.4190057068284169  | 0.6200508564188256 | T | T | T |
| 0.4166667494269589 | 0.7499997517191233  | 0.2412107666657235 | F | F | F |
| 0.4166667494269589 | 0.7499997517191233  | 0.3739663535723068 | F | F | F |
| 0.2499997482808780 | 0.9166667528651971  | 0.3605224726145337 | F | F | F |
| 0.4177884101787060 | 0.7503375479121783  | 0.5027782146543477 | T | T | T |
| 0.2499997482808780 | 0.9166667528651971  | 0.4932780595211170 | F | F | F |
| 0.4170638871736470 | 0.7480904230737730  | 0.6304882218354840 | T | T | T |
| 0.2526148016505800 | 0.9116598809977159  | 0.6201514136809952 | T | T | T |
| 0.2281673618767206 | 0.9542198469739350  | 0.7453155221889176 | T | T | T |
| 0.9166667528651971 | 0.2499997482808780  | 0.2412107666657235 | F | F | F |
| 0.9166667528651971 | 0.2499997482808780  | 0.3739663535723068 | F | F | F |
| 0.7499997517191233 | 0.4166667494269589  | 0.3605224726145337 | F | F | F |
| 0.9181277505428501 | 0.2501557430488162  | 0.5029531996075608 | T | T | T |
| 0.7499997517191233 | 0.4166667494269589  | 0.4932780595211170 | F | F | F |
| 0.9212112749683655 | 0.2466122136421008  | 0.6295851970972232 | T | T | T |
| 0.7549099960555504 | 0.4218791879260139  | 0.6199501316428995 | T | T | T |
| 0.7596775337247255 | 0.4277311753756869  | 0.7476901622015549 | T | T | T |
| 0.9166667528651971 | 0.7499997517191233  | 0.2412107666657235 | F | F | F |
| 0.9166667528651971 | 0.7499997517191233  | 0.3739663535723068 | F | F | F |
| 0.7499997517191233 | 0.9166667528651971  | 0.3605224726145337 | F | F | F |
| 0.9178786933438837 | 0.7511470428683635  | 0.5029786220890143 | T | T | T |
| 0.7499997517191233 | 0.9166667528651971  | 0.4932780595211170 | F | F | F |
| 0.9210891837977434 | 0.7601280261613748  | 0.6288111672445051 | T | T | T |
| 0.7454039659652092 | 0.9156922154854537  | 0.6201503430228081 | T | T | T |
| 0.8120319565499451 | -0.0470721609099332 | 0.7452743824961052 | T | T | T |

0.3025393984358306 0.5269853111697717 0.8095663116282518 T T T  
0.4166667494269589 0.2499997482808780 0.2701955255983037 F F F  
0.2499997482808780 0.4166667494269589 0.3315377136819535 F F F  
0.4166667494269589 0.2499997482808780 0.4029511125048870 F F F  
0.2499997482808780 0.4166667494269589 0.4642933005885368 F F F  
0.4183921839046031 0.2501923110555380 0.5314553444505936 T T T  
0.2528774498776686 0.4181910998523684 0.5915422035897070 T T T  
0.4174868250792665 0.2516906629209767 0.6581252004422242 T T T  
0.4166667494269589 0.7499997517191233 0.2701955255983037 F F F  
0.2499997482808780 0.9166667528651971 0.3315377136819535 F F F  
0.4166667494269589 0.7499997517191233 0.4029511125048870 F F F  
0.2499997482808780 0.9166667528651971 0.4642933005885368 F F F  
0.4183559668537952 0.7503302662455558 0.5312732357728310 T T T  
0.2525546983003457 0.9173578754532157 0.5916553783654490 T T T  
0.4199781424115151 0.7524534968177692 0.6589441149009044 T T T  
0.2464810850662720 0.9242782039693843 0.7172982834261409 T T T  
0.9166667528651971 0.2499997482808780 0.2701955255983037 F F F  
0.7499997517191233 0.4166667494269589 0.3315377136819535 F F F  
0.9166667528651971 0.2499997482808780 0.4029511125048870 F F F  
0.7499997517191233 0.4166667494269589 0.4642933005885368 F F F  
0.9187545204168608 0.2505966115580344 0.5314455230564007 T T T  
0.7525182080563931 0.4178268728180514 0.5914871235927485 T T T  
0.9218630335791821 0.2518430899972077 0.6580968872042950 T T T  
0.7544383197273254 0.4198220565042752 0.7192872975552524 T T T  
0.9166667528651971 0.7499997517191233 0.2701955255983037 F F F  
0.7499997517191233 0.9166667528651971 0.3315377136819535 F F F

|                    |                    |                    |   |   |   |
|--------------------|--------------------|--------------------|---|---|---|
| 0.9166667528651971 | 0.7499997517191233 | 0.4029511125048870 | F | F | F |
| 0.7499997517191233 | 0.9166667528651971 | 0.4642933005885368 | F | F | F |
| 0.9187277990367090 | 0.7514969667680089 | 0.5314703009984083 | T | T | T |
| 0.7518208826168163 | 0.9177984057083063 | 0.5916536045655129 | T | T | T |
| 0.9191076368492636 | 0.7512611137381664 | 0.6572737057610352 | T | T | T |
| 0.7646915676662427 | 0.9236796085410638 | 0.7172665194480672 | T | T | T |
| 0.2450549738080819 | 0.4020216589409059 | 0.7184459924499257 | T | T | T |
| 0.2268423280380385 | 0.3680130237912239 | 0.7595082584819539 | T | T | T |
| 0.1130945854416681 | 0.1383187032546733 | 0.7702386088366912 | T | T | T |
| 0.3239278791326488 | 0.5675310726491414 | 0.7802098928489696 | T | T | T |

**(8) \*OCNN adsorbed on  $\beta$ -Rh@Ni(OH)<sub>2</sub>**

Rh Ni H O C N

1.0000000000000000

6.3986245000000004 0.0000000000000000 0.0000000000000000

-3.1993122500000006 5.5413713662775024 0.0000000000000000

0.0000000000000000 0.0000000000000000 34.1167642999999998

Rh Ni H O C N

1 15 31 32 1 2

Selective dynamics

Direct

|                    |                    |                    |   |   |   |
|--------------------|--------------------|--------------------|---|---|---|
| 0.0759974717081476 | 0.0835030596437960 | 0.6865604120676627 | T | T | T |
| 0.0833332471348029 | 0.0833332471348029 | 0.3008666196401251 | F | F | F |
| 0.0833332471348029 | 0.0833332471348029 | 0.4336222065467084 | F | F | F |
| 0.0789870385836337 | 0.0864088735557338 | 0.5620498911078173 | T | T | T |
| 0.0833332471348029 | 0.5833332505730411 | 0.3008666196401251 | F | F | F |

0.0833332471348029 0.5833332505730411 0.4336222065467084 F F F  
0.0792218460255205 0.5864041472323701 0.5617048232394187 T T T  
0.0727005273013528 0.5863027913184924 0.6914755148904270 T T T  
0.5833332505730411 0.0833332471348029 0.3008666196401251 F F F  
0.5833332505730411 0.0833332471348029 0.4336222065467084 F F F  
0.5795121836276876 0.0861376585970683 0.5617188323896074 T T T  
0.5740542385077522 0.0866435945873390 0.6909887859828772 T T T  
0.5833332505730411 0.5833332505730411 0.3008666196401251 F F F  
0.5833332505730411 0.5833332505730411 0.4336222065467084 F F F  
0.5787966486444925 0.5859832662809465 0.5617410162458436 T T T  
0.5781040685650459 0.5855542936065085 0.6886134568158050 T T T  
0.4166667494269589 0.2499997482808780 0.2412107666657235 F F F  
0.4166667494269589 0.2499997482808780 0.3739663535723068 F F F  
0.2499997482808780 0.4166667494269589 0.3605224726145337 F F F  
0.4128090457302175 0.2505169565419594 0.5033028145409525 T T T  
0.2499997482808780 0.4166667494269589 0.4932780595211170 F F F  
0.3932937774237920 0.2393078345714561 0.6293536042789055 T T T  
0.2529291672179753 0.4280938711343181 0.6203547375329030 T T T  
0.4166667494269589 0.7499997517191233 0.2412107666657235 F F F  
0.4166667494269589 0.7499997517191233 0.3739663535723068 F F F  
0.2499997482808780 0.9166667528651971 0.3605224726145337 F F F  
0.4146692225121777 0.7517274250565650 0.5031244110345056 T T T  
0.2499997482808780 0.9166667528651971 0.4932780595211170 F F F  
0.4102647160093089 0.7533653362036893 0.6317926897365781 T T T  
0.2439089803425085 0.9101403958339055 0.6205570782556792 T T T  
0.2127252097607635 0.9742994389590728 0.7449003938653947 T T T

0.9166667528651971 0.2499997482808780 0.2412107666657235 F F F  
0.9166667528651971 0.2499997482808780 0.3739663535723068 F F F  
0.7499997517191233 0.4166667494269589 0.3605224726145337 F F F  
0.9154928247240725 0.2516141067660523 0.5031840077526880 T T T  
0.7499997517191233 0.4166667494269589 0.4932780595211170 F F F  
0.9207174902689100 0.2546934618108971 0.6304656514307876 T T T  
0.7425080589514144 0.4192316884961442 0.6201579677934353 T T T  
0.7050217526210901 0.4343940724462433 0.7449443514088908 T T T  
0.9166667528651971 0.7499997517191233 0.2412107666657235 F F F  
0.9166667528651971 0.7499997517191233 0.3739663535723068 F F F  
0.7499997517191233 0.9166667528651971 0.3605224726145337 F F F  
0.9146143877949982 0.7530333957963403 0.5033150136421725 T T T  
0.7499997517191233 0.9166667528651971 0.4932780595211170 F F F  
0.9117197310142067 0.7646237982454903 0.6292232484212901 T T T  
0.7383396096893219 0.9210809183394357 0.6203786003409664 T T T  
0.7915648670972486 0.9300269719058855 0.7449526830547379 T T T  
0.4166667494269589 0.2499997482808780 0.2701955255983037 F F F  
0.2499997482808780 0.4166667494269589 0.3315377136819535 F F F  
0.4166667494269589 0.2499997482808780 0.4029511125048870 F F F  
0.2499997482808780 0.4166667494269589 0.4642933005885368 F F F  
0.4120449779779999 0.2518469414198316 0.5318045744482826 T T T  
0.2454984431940521 0.4204983846415060 0.5918856000359276 T T T  
0.4065051699212123 0.2544836301453582 0.6577587602174536 T T T  
0.4166667494269589 0.7499997517191233 0.2701955255983037 F F F  
0.2499997482808780 0.9166667528651971 0.3315377136819535 F F F  
0.4166667494269589 0.7499997517191233 0.4029511125048870 F F F

|                    |                    |                    |   |   |   |
|--------------------|--------------------|--------------------|---|---|---|
| 0.2499997482808780 | 0.9166667528651971 | 0.4642933005885368 | F | F | F |
| 0.4132284013277976 | 0.7527113430365957 | 0.5316144742685086 | T | T | T |
| 0.2452797014327311 | 0.9187644030586793 | 0.5921024508393986 | T | T | T |
| 0.4111527423784020 | 0.7501530947403287 | 0.6602256357870305 | T | T | T |
| 0.2337154625876205 | 0.9233493638513272 | 0.7169130564236401 | T | T | T |
| 0.9166667528651971 | 0.2499997482808780 | 0.2701955255983037 | F | F | F |
| 0.7499997517191233 | 0.4166667494269589 | 0.3315377136819535 | F | F | F |
| 0.9166667528651971 | 0.2499997482808780 | 0.4029511125048870 | F | F | F |
| 0.7499997517191233 | 0.4166667494269589 | 0.4642933005885368 | F | F | F |
| 0.9135991344479606 | 0.2529038123850527 | 0.5316821869666759 | T | T | T |
| 0.7449443533479007 | 0.4192000223151354 | 0.5917122346363398 | T | T | T |
| 0.9108956271724203 | 0.2533741758431244 | 0.6589264080492920 | T | T | T |
| 0.7377196188714983 | 0.4207036329129138 | 0.7170566833048718 | T | T | T |
| 0.9166667528651971 | 0.7499997517191233 | 0.2701955255983037 | F | F | F |
| 0.7499997517191233 | 0.9166667528651971 | 0.3315377136819535 | F | F | F |
| 0.9166667528651971 | 0.7499997517191233 | 0.4029511125048870 | F | F | F |
| 0.7499997517191233 | 0.9166667528651971 | 0.4642933005885368 | F | F | F |
| 0.9128695997829412 | 0.7533503510798897 | 0.5318155992249198 | T | T | T |
| 0.7450972154087983 | 0.9201812831346837 | 0.5919111194749225 | T | T | T |
| 0.9050738671705392 | 0.7524642698667785 | 0.6576928918391532 | T | T | T |
| 0.7569436504816817 | 0.9191153909450173 | 0.7167216664273416 | T | T | T |
| 0.2428574832890316 | 0.4022970701586354 | 0.7169807966316746 | T | T | T |
| 0.2838141041955074 | 0.3507413532642395 | 0.7561027147469047 | T | T | T |
| 0.1534228005689274 | 0.1428633526910582 | 0.7731827551002343 | T | T | T |
| 0.4730760524538186 | 0.4932121069457469 | 0.7762434289489766 | T | T | T |

(9) \*OCNHNH adsorbed on  $\beta$ -Pd@Ni(OH)<sub>2</sub>

Pd Ni H O C N

1.0000000000000000

6.3986245000000004 0.0000000000000000 0.0000000000000000  
-3.1993122500000006 5.5413713662775024 0.0000000000000000  
0.0000000000000000 0.0000000000000000 34.1167642999999998

Pd Ni H O C N

1 15 33 32 1 2

Selective dynamics

Direct

0.0719470629539033 0.0744692696601118 0.6873908057053211 T T T  
0.0833332471348029 0.0833332471348029 0.3008666196401251 F F F  
0.0833332471348029 0.0833332471348029 0.4336222065467084 F F F  
0.0746207086138802 0.0748531597377960 0.5619478386408576 T T T  
0.0833332471348029 0.5833332505730411 0.3008666196401251 F F F  
0.0833332471348029 0.5833332505730411 0.4336222065467084 F F F  
0.0749597754033616 0.5755810910622299 0.5615468987063821 T T T  
0.0694232390075900 0.5729536165245587 0.6914657991152116 T T T  
0.5833332505730411 0.0833332471348029 0.3008666196401251 F F F  
0.5833332505730411 0.0833332471348029 0.4336222065467084 F F F  
0.5753373210272328 0.0749592505976218 0.5616905288056617 T T T  
0.5751837511107689 0.0770157343088457 0.6912380358862399 T T T  
0.5833332505730411 0.5833332505730411 0.3008666196401251 F F F  
0.5833332505730411 0.5833332505730411 0.4336222065467084 F F F

0.5744379915946610 0.5747544459863028 0.5615415211946947 T T T  
0.5796374102098595 0.5772656477442696 0.6907304408868165 T T T  
0.4166667494269589 0.2499997482808780 0.2412107666657235 F F F  
0.4166667494269589 0.2499997482808780 0.3739663535723068 F F F  
0.2499997482808780 0.4166667494269589 0.3605224726145337 F F F  
0.4091071097848349 0.2434394968396102 0.5030944686421264 T T T  
0.2499997482808780 0.4166667494269589 0.4932780595211170 F F F  
0.3972744928346009 0.2267845308057698 0.6299029253613151 T T T  
0.2535869492544024 0.4161675937607768 0.6203498210020946 T T T  
0.4166667494269589 0.7499997517191233 0.2412107666657235 F F F  
0.4166667494269589 0.7499997517191233 0.3739663535723068 F F F  
0.2499997482808780 0.9166667528651971 0.3605224726145337 F F F  
0.4119038296288681 0.7454823345900520 0.5030748008015666 T T T  
0.2499997482808780 0.9166667528651971 0.4932780595211170 F F F  
0.4047408013954159 0.7397158975813334 0.6325151700354109 T T T  
0.2326676031491644 0.8957310290634375 0.6203978272466463 T T T  
0.2081291493054244 0.9194167049329144 0.7474856639761571 T T T  
0.9166667528651971 0.2499997482808780 0.2412107666657235 F F F  
0.9166667528651971 0.2499997482808780 0.3739663535723068 F F F  
0.7499997517191233 0.4166667494269589 0.3605224726145337 F F F  
0.9131936022190693 0.2451405758695451 0.5031287404870233 T T T  
0.7499997517191233 0.4166667494269589 0.4932780595211170 F F F  
0.9227426299148619 0.2583695802358926 0.6298485136911210 T T T  
0.7364199886125053 0.4056380760794566 0.6197317125162218 T T T  
0.7020245657189239 0.4235479518750094 0.7467446913106511 T T T  
0.9166667528651971 0.7499997517191233 0.2412107666657235 F F F

0.9166667528651971 0.7499997517191233 0.3739663535723068 F F F  
0.7499997517191233 0.9166667528651971 0.3605224726145337 F F F  
0.9116609302685261 0.7464407304181800 0.5031182609633668 T T T  
0.7499997517191233 0.9166667528651971 0.4932780595211170 F F F  
0.8983112668169823 0.7312285005576346 0.6281812659218508 T T T  
0.7421417281174996 0.9128774508727143 0.6204414341957286 T T T  
0.8190317891917764 0.9818072826625530 0.7452653788144925 T T T  
0.0581049164243173 0.1480173195646938 0.8058098821798260 T T T  
0.4461847327917126 0.4054168820239784 0.8092775779572620 T T T  
0.4166667494269589 0.2499997482808780 0.2701955255983037 F F F  
0.2499997482808780 0.4166667494269589 0.3315377136819535 F F F  
0.4166667494269589 0.2499997482808780 0.4029511125048870 F F F  
0.2499997482808780 0.4166667494269589 0.4642933005885368 F F F  
0.4076021715482029 0.2413125072795589 0.5315910353574452 T T T  
0.2420187222934170 0.4089351785670321 0.5919226789031442 T T T  
0.4098799625898712 0.2409144486252373 0.6583457874856842 T T T  
0.4166667494269589 0.7499997517191233 0.2701955255983037 F F F  
0.2499997482808780 0.9166667528651971 0.3315377136819535 F F F  
0.4166667494269589 0.7499997517191233 0.4029511125048870 F F F  
0.2499997482808780 0.9166667528651971 0.4642933005885368 F F F  
0.4090425324235774 0.7426734002654680 0.5315689699774994 T T T  
0.2407054973957338 0.9070997045796436 0.5919538286046380 T T T  
0.4025699847084701 0.7367656329300002 0.6609760107349453 T T T  
0.2350843324908931 0.9041655429175153 0.7198819800514553 T T T  
0.9166667528651971 0.2499997482808780 0.2701955255983037 F F F  
0.7499997517191233 0.4166667494269589 0.3315377136819535 F F F

|                    |                    |                    |   |   |   |
|--------------------|--------------------|--------------------|---|---|---|
| 0.9166667528651971 | 0.2499997482808780 | 0.4029511125048870 | F | F | F |
| 0.7499997517191233 | 0.4166667494269589 | 0.4642933005885368 | F | F | F |
| 0.9104041322797467 | 0.2430044225079445 | 0.5316313028609517 | T | T | T |
| 0.7397828123481843 | 0.4065166968497096 | 0.5912164753648153 | T | T | T |
| 0.9071065255375577 | 0.2514849485163327 | 0.6582789167121794 | T | T | T |
| 0.7412032613107052 | 0.4093740406008513 | 0.7193001187544419 | T | T | T |
| 0.9166667528651971 | 0.7499997517191233 | 0.2701955255983037 | F | F | F |
| 0.7499997517191233 | 0.9166667528651971 | 0.3315377136819535 | F | F | F |
| 0.9166667528651971 | 0.7499997517191233 | 0.4029511125048870 | F | F | F |
| 0.7499997517191233 | 0.9166667528651971 | 0.4642933005885368 | F | F | F |
| 0.9087454286437391 | 0.7430483853455520 | 0.5316069969421852 | T | T | T |
| 0.7413704200669100 | 0.9084658949409785 | 0.5919600607502249 | T | T | T |
| 0.8987033024298834 | 0.7222821958387274 | 0.6566390922153128 | T | T | T |
| 0.7477471723965673 | 0.9174816302122456 | 0.7185069836052559 | T | T | T |
| 0.2542872211165290 | 0.4119835968827357 | 0.7244853927804672 | T | T | T |
| 0.2545545049891919 | 0.3487177376028763 | 0.7623749670310775 | T | T | T |
| 0.0419221309432532 | 0.1745709739835416 | 0.7766331170542987 | T | T | T |
| 0.4706274378370023 | 0.4522559437987499 | 0.7801766288981759 | T | T | T |

**(10) \*OCNHNH adsorbed on  $\beta$ -Ir@Ni(OH)<sub>2</sub>**

Ir Ni H O C N

1.0000000000000000

6.3986245000000004 0.0000000000000000 0.0000000000000000

-3.1993122500000006 5.5413713662775024 0.0000000000000000

0.0000000000000000 0.0000000000000000 34.1167642999999998

Ir Ni H O C N

1 15 33 32 1 2

Selective dynamics

Direct

|                    |                    |                    |   |   |   |
|--------------------|--------------------|--------------------|---|---|---|
| 0.0773400588013167 | 0.0740356208906695 | 0.6851939216865709 | T | T | T |
| 0.0833332471348029 | 0.0833332471348029 | 0.3008666196401251 | F | F | F |
| 0.0833332471348029 | 0.0833332471348029 | 0.4336222065467084 | F | F | F |
| 0.0781266675314249 | 0.0756654617260662 | 0.5622950599791547 | T | T | T |
| 0.0833332471348029 | 0.5833332505730411 | 0.3008666196401251 | F | F | F |
| 0.0833332471348029 | 0.5833332505730411 | 0.4336222065467084 | F | F | F |
| 0.0786201899789373 | 0.5758486175405850 | 0.5620425946671701 | T | T | T |
| 0.0778628645087300 | 0.5783938285089861 | 0.6913995621301647 | T | T | T |
| 0.5833332505730411 | 0.0833332471348029 | 0.3008666196401251 | F | F | F |
| 0.5833332505730411 | 0.0833332471348029 | 0.4336222065467084 | F | F | F |
| 0.5783319039898754 | 0.0755489882049778 | 0.5619360580578839 | T | T | T |
| 0.5757715523254253 | 0.0750973709850525 | 0.6914216811939239 | T | T | T |
| 0.5833332505730411 | 0.5833332505730411 | 0.3008666196401251 | F | F | F |
| 0.5833332505730411 | 0.5833332505730411 | 0.4336222065467084 | F | F | F |
| 0.5780682543888752 | 0.5757773567067707 | 0.5620535612699225 | T | T | T |
| 0.5787340545919596 | 0.5783767807807425 | 0.6907805918057319 | T | T | T |
| 0.4166667494269589 | 0.2499997482808780 | 0.2412107666657235 | F | F | F |
| 0.4166667494269589 | 0.2499997482808780 | 0.3739663535723068 | F | F | F |
| 0.2499997482808780 | 0.4166667494269589 | 0.3605224726145337 | F | F | F |
| 0.4132500613222356 | 0.2452283648870496 | 0.5034823426058359 | T | T | T |
| 0.2499997482808780 | 0.4166667494269589 | 0.4932780595211170 | F | F | F |
| 0.4060985882377681 | 0.2396496071387096 | 0.6291232237839010 | T | T | T |
| 0.2445059533285633 | 0.4093400796257423 | 0.6208393648994659 | T | T | T |

0.4166667494269589 0.7499997517191233 0.2412107666657235 F F F  
0.4166667494269589 0.7499997517191233 0.3739663535723068 F F F  
0.2499997482808780 0.9166667528651971 0.3605224726145337 F F F  
0.4135174655082296 0.7455136159974799 0.5034300006870340 T T T  
0.2499997482808780 0.9166667528651971 0.4932780595211170 F F F  
0.4091705670029488 0.7390719157554917 0.6317746038972055 T T T  
0.2453454870348447 0.9054792467087898 0.6205920447863084 T T T  
0.2028077195235334 0.9709366153459732 0.7439820346497965 T T T  
0.9166667528651971 0.2499997482808780 0.2412107666657235 F F F  
0.9166667528651971 0.2499997482808780 0.3739663535723068 F F F  
0.7499997517191233 0.4166667494269589 0.3605224726145337 F F F  
0.9144444380780591 0.2464717922953271 0.5035046799356286 T T T  
0.7499997517191233 0.4166667494269589 0.4932780595211170 F F F  
0.9133487757171367 0.2458440282742160 0.6297779290398515 T T T  
0.7411815676724651 0.4055508648798502 0.6203507454789577 T T T  
0.7390148033165829 0.4191495999092193 0.7475335077687959 T T T  
0.9166667528651971 0.7499997517191233 0.2412107666657235 F F F  
0.9166667528651971 0.7499997517191233 0.3739663535723068 F F F  
0.7499997517191233 0.9166667528651971 0.3605224726145337 F F F  
0.9134835727261473 0.7452165490668677 0.5034541012380347 T T T  
0.7499997517191233 0.9166667528651971 0.4932780595211170 F F F  
0.9120463880697288 0.7452863896842200 0.6286139624062629 T T T  
0.7431344315446031 0.9102823395706202 0.6207111838974433 T T T  
0.8300556293324938 0.9543944025948975 0.7440505280432195 T T T  
0.1363100297096476 0.1163523268040386 0.8005598361414098 T T T  
0.3699508878258079 0.5440103713325212 0.8058911046347303 T T T

0.4166667494269589 0.2499997482808780 0.2701955255983037 F F F  
0.2499997482808780 0.4166667494269589 0.3315377136819535 F F F  
0.4166667494269589 0.2499997482808780 0.4029511125048870 F F F  
0.2499997482808780 0.4166667494269589 0.4642933005885368 F F F  
0.4115819255906237 0.2429606368024288 0.5319813418286299 T T T  
0.2449767703861988 0.4084042736668206 0.5923268350396106 T T T  
0.4154780072871305 0.2447224602846194 0.6576119736713472 T T T  
0.4166667494269589 0.7499997517191233 0.2701955255983037 F F F  
0.2499997482808780 0.9166667528651971 0.3315377136819535 F F F  
0.4166667494269589 0.7499997517191233 0.4029511125048870 F F F  
0.2499997482808780 0.9166667528651971 0.4642933005885368 F F F  
0.4122093888968620 0.7430114073290145 0.5319337811732834 T T T  
0.2443841205241384 0.9078983666240260 0.5920790242466399 T T T  
0.4095020391983002 0.7409375544368909 0.6602055124662245 T T T  
0.2343332182047275 0.9168919401214826 0.7167430966031927 T T T  
0.9166667528651971 0.2499997482808780 0.2701955255983037 F F F  
0.7499997517191233 0.4166667494269589 0.3315377136819535 F F F  
0.9166667528651971 0.2499997482808780 0.4029511125048870 F F F  
0.7499997517191233 0.4166667494269589 0.4642933005885368 F F F  
0.9132019680429128 0.2439628540544411 0.5320087666916457 T T T  
0.7444132934682860 0.4082398069128957 0.5918937463998045 T T T  
0.9095618064471495 0.2470608181231418 0.6582981265804170 T T T  
0.7436779849705495 0.4110979439480772 0.7191777151189368 T T T  
0.9166667528651971 0.7499997517191233 0.2701955255983037 F F F  
0.7499997517191233 0.9166667528651971 0.3315377136819535 F F F  
0.9166667528651971 0.7499997517191233 0.4029511125048870 F F F

|                    |                    |                    |   |   |   |
|--------------------|--------------------|--------------------|---|---|---|
| 0.7499997517191233 | 0.9166667528651971 | 0.4642933005885368 | F | F | F |
| 0.9115394696134437 | 0.7433618155288166 | 0.5319491214988283 | T | T | T |
| 0.7444027346149947 | 0.9090402718751749 | 0.5921998786934561 | T | T | T |
| 0.9098702088327046 | 0.7396755877344736 | 0.6571362613626354 | T | T | T |
| 0.7638684043700855 | 0.9191009178974486 | 0.7166673648251797 | T | T | T |
| 0.2325072513958593 | 0.3825600034323970 | 0.7177792719474593 | T | T | T |
| 0.2418715563142023 | 0.3579208381560355 | 0.7593046478309771 | T | T | T |
| 0.1217374628377045 | 0.1250012048379679 | 0.7708803870228106 | T | T | T |
| 0.3674222911548380 | 0.5670525325914885 | 0.7762223845856919 | T | T | T |

**(11) \*OCNHNH adsorbed on  $\beta$ -Pt@Ni(OH)<sub>2</sub>**

Pt Ni H O C N

1.0000000000000000

6.3986245000000004 0.0000000000000000 0.0000000000000000

-3.1993122500000006 5.5413713662775024 0.0000000000000000

0.0000000000000000 0.0000000000000000 34.1167642999999998

Pt Ni H O C N

1 15 33 32 1 2

Selective dynamics

Direct

|                    |                    |                    |   |   |   |
|--------------------|--------------------|--------------------|---|---|---|
| 0.0658141001638736 | 0.0885570225973990 | 0.6864044263683652 | T | T | T |
| 0.0833332471348029 | 0.0833332471348029 | 0.3008666196401251 | F | F | F |
| 0.0833332471348029 | 0.0833332471348029 | 0.4336222065467084 | F | F | F |
| 0.0751697300175487 | 0.0819010044155842 | 0.5617219524580468 | T | T | T |
| 0.0833332471348029 | 0.5833332505730411 | 0.3008666196401251 | F | F | F |
| 0.0833332471348029 | 0.5833332505730411 | 0.4336222065467084 | F | F | F |
| 0.0757315585807624 | 0.5829658689992765 | 0.5611837563557528 | T | T | T |

0.0631339040621481 0.5834873615705778 0.6903965429237833 T T T  
0.5833332505730411 0.0833332471348029 0.3008666196401251 F F F  
0.5833332505730411 0.0833332471348029 0.4336222065467084 F F F  
0.5759764767566323 0.0820090564326390 0.5614621786133680 T T T  
0.5685586555724014 0.0883623143308138 0.6900443924174079 T T T  
0.5833332505730411 0.5833332505730411 0.3008666196401251 F F F  
0.5833332505730411 0.5833332505730411 0.4336222065467084 F F F  
0.5752084769626056 0.5818139776486904 0.5612197717446761 T T T  
0.5730466150991652 0.5902905657457514 0.6909112563396236 T T T  
0.4166667494269589 0.2499997482808780 0.2412107666657235 F F F  
0.4166667494269589 0.2499997482808780 0.3739663535723068 F F F  
0.2499997482808780 0.4166667494269589 0.3605224726145337 F F F  
0.4096710468760997 0.2473515762805721 0.5028685402403033 T T T  
0.2499997482808780 0.4166667494269589 0.4932780595211170 F F F  
0.3921261867324868 0.2355247729837759 0.6294136978981932 T T T  
0.2553568410325643 0.4282261972772077 0.6200584569565584 T T T  
0.4166667494269589 0.7499997517191233 0.2412107666657235 F F F  
0.4166667494269589 0.7499997517191233 0.3739663535723068 F F F  
0.2499997482808780 0.9166667528651971 0.3605224726145337 F F F  
0.4131562415230322 0.7505782785419562 0.5029308881223811 T T T  
0.2499997482808780 0.9166667528651971 0.4932780595211170 F F F  
0.4045911754827514 0.7528262052769248 0.6321823065081931 T T T  
0.2299252917114737 0.9022825584452558 0.6202415798739511 T T T  
0.2039224308232407 0.9250740058912523 0.7463791953577088 T T T  
0.9166667528651971 0.2499997482808780 0.2412107666657235 F F F  
0.9166667528651971 0.2499997482808780 0.3739663535723068 F F F

0.7499997517191233 0.4166667494269589 0.3605224726145337 F F F  
0.9140737828839354 0.2490677451182112 0.5029310888809103 T T T  
0.7499997517191233 0.4166667494269589 0.4932780595211170 F F F  
0.9272822466730245 0.2753637486632032 0.6291158647809867 T T T  
0.7341882475050320 0.4126280177129745 0.6192661531254526 T T T  
0.7008731407510279 0.4238794156535764 0.7459184463710379 T T T  
0.9166667528651971 0.7499997517191233 0.2412107666657235 F F F  
0.9166667528651971 0.7499997517191233 0.3739663535723068 F F F  
0.7499997517191233 0.9166667528651971 0.3605224726145337 F F F  
0.9115407887765180 0.7504718198492236 0.5028691570018684 T T T  
0.7499997517191233 0.9166667528651971 0.4932780595211170 F F F  
0.8932490867741472 0.7347560121912015 0.6282828805877200 T T T  
0.7465796365282040 0.9235729763890480 0.6204774581872985 T T T  
0.8084789203564051 0.0197563260673816 0.7442924346128427 T T T  
0.0087539736704682 0.2045539336855184 0.8044422648846036 T T T  
0.4043809953109731 0.3986820548493522 0.8085849698031319 T T T  
0.4166667494269589 0.2499997482808780 0.2701955255983037 F F F  
0.2499997482808780 0.4166667494269589 0.3315377136819535 F F F  
0.4166667494269589 0.2499997482808780 0.4029511125048870 F F F  
0.2499997482808780 0.4166667494269589 0.4642933005885368 F F F  
0.4081052407861549 0.2476971639512507 0.5313687505807060 T T T  
0.2422995429866027 0.4171580939877189 0.5916797126173527 T T T  
0.4058085782179115 0.2529278841783467 0.6578327347615487 T T T  
0.4166667494269589 0.7499997517191233 0.2701955255983037 F F F  
0.2499997482808780 0.9166667528651971 0.3315377136819535 F F F  
0.4166667494269589 0.7499997517191233 0.4029511125048870 F F F

|                    |                    |                    |   |   |   |
|--------------------|--------------------|--------------------|---|---|---|
| 0.2499997482808780 | 0.9166667528651971 | 0.4642933005885368 | F | F | F |
| 0.4102257485878891 | 0.7494865665223295 | 0.5314375116475789 | T | T | T |
| 0.2404395878743161 | 0.9149078338068680 | 0.5918398899732683 | T | T | T |
| 0.3929998859931171 | 0.7460744255746062 | 0.6606014664899408 | T | T | T |
| 0.2205747779206396 | 0.9095842722351638 | 0.7184007122679157 | T | T | T |
| 0.9166667528651971 | 0.2499997482808780 | 0.2701955255983037 | F | F | F |
| 0.7499997517191233 | 0.4166667494269589 | 0.3315377136819535 | F | F | F |
| 0.9166667528651971 | 0.2499997482808780 | 0.4029511125048870 | F | F | F |
| 0.7499997517191233 | 0.4166667494269589 | 0.4642933005885368 | F | F | F |
| 0.9112580997112399 | 0.2493759359039490 | 0.5314417612150734 | T | T | T |
| 0.7392108808322569 | 0.4134736882090340 | 0.5907771160684467 | T | T | T |
| 0.9088839023412842 | 0.2720590054252022 | 0.6575168743746813 | T | T | T |
| 0.7362147361386691 | 0.4221856298273462 | 0.7180118856753523 | T | T | T |
| 0.9166667528651971 | 0.7499997517191233 | 0.2701955255983037 | F | F | F |
| 0.7499997517191233 | 0.9166667528651971 | 0.3315377136819535 | F | F | F |
| 0.9166667528651971 | 0.7499997517191233 | 0.4029511125048870 | F | F | F |
| 0.7499997517191233 | 0.9166667528651971 | 0.4642933005885368 | F | F | F |
| 0.9096640526913542 | 0.7495284776329030 | 0.5313828907413868 | T | T | T |
| 0.7420787220252195 | 0.9162816973151767 | 0.5920282045414044 | T | T | T |
| 0.8921389902595883 | 0.7219065955559018 | 0.6567072626911511 | T | T | T |
| 0.7418115506658181 | 0.9362432037414604 | 0.7180492351731751 | T | T | T |
| 0.2447164718550581 | 0.4439045929156313 | 0.7231888526926664 | T | T | T |
| 0.2289232260086650 | 0.3770842483019680 | 0.7612982260816188 | T | T | T |
| 0.0036498607149115 | 0.2315009877848564 | 0.7749405834141925 | T | T | T |
| 0.4389341681887445 | 0.4484411016831262 | 0.7796382660906678 | T | T | T |

(12) \*OCNNH adsorbed on  $\beta$ -Au@Ni(OH)<sub>2</sub>

Au Ni H O C N

1.0000000000000000

6.3986245000000004 0.0000000000000000 0.0000000000000000

-3.1993122500000006 5.5413713662775024 0.0000000000000000

0.0000000000000000 0.0000000000000000 34.1167642999999998

Au Ni H O C N

1 15 32 32 1 2

Selective dynamics

Direct

0.0654456974812326 0.0766492768992123 0.6883459282564761 T T T

0.0833332471348029 0.0833332471348029 0.3008666196401251 F F F

0.0833332471348029 0.0833332471348029 0.4336222065467084 F F F

0.0823739462183575 0.0855497741915469 0.5616642303097382 T T T

0.0833332471348029 0.5833332505730411 0.3008666196401251 F F F

0.0833332471348029 0.5833332505730411 0.4336222065467084 F F F

0.0829470404225005 0.5855402080735275 0.5616108998824614 T T T

0.0658443482474539 0.5821015144455561 0.6909801530545782 T T T

0.5833332505730411 0.0833332471348029 0.3008666196401251 F F F

0.5833332505730411 0.0833332471348029 0.4336222065467084 F F F

0.5839378792892141 0.0883474724683723 0.5607117274250684 T T T

0.5649092871598149 0.0789511440005001 0.6919633088638372 T T T

0.5833332505730411 0.5833332505730411 0.3008666196401251 F F F

0.5833332505730411 0.5833332505730411 0.4336222065467084 F F F

0.5840724708660439 0.5832599138982807 0.5608377043813891 T T T

0.5693765241692227 0.5834464386799684 0.6907947640683826 T T T

0.4166667494269589 0.2499997482808780 0.2412107666657235 F F F  
0.4166667494269589 0.2499997482808780 0.3739663535723068 F F F  
0.2499997482808780 0.4166667494269589 0.3605224726145337 F F F  
0.4119289288259440 0.2493473071214345 0.5023105838632984 T T T  
0.2499997482808780 0.4166667494269589 0.4932780595211170 F F F  
0.3718072805143974 0.2312649124085570 0.6355596210906209 T T T  
0.2549610260809174 0.4236695518861781 0.6201315942407060 T T T  
0.4166667494269589 0.7499997517191233 0.2412107666657235 F F F  
0.4166667494269589 0.7499997517191233 0.3739663535723068 F F F  
0.2499997482808780 0.9166667528651971 0.3605224726145337 F F F  
0.4147803580579865 0.7497873377794612 0.5030734360752435 T T T  
0.2499997482808780 0.9166667528651971 0.4932780595211170 F F F  
0.3846282241087844 0.7327873564775407 0.6314029389171517 T T T  
0.2609000611651521 0.9195275785207663 0.6200705361425772 T T T  
0.2206599929590470 0.9765947651491131 0.7457564482462619 T T T  
0.9166667528651971 0.2499997482808780 0.2412107666657235 F F F  
0.9166667528651971 0.2499997482808780 0.3739663535723068 F F F  
0.7499997517191233 0.4166667494269589 0.3605224726145337 F F F  
0.9194443187602670 0.2502142577973695 0.5027523116949497 T T T  
0.7499997517191233 0.4166667494269589 0.4932780595211170 F F F  
0.9060850549193933 0.2530878837255490 0.6321729977282412 T T T  
0.6910978411608194 0.3908489529783465 0.6177310160389450 T T T  
0.7576631681964862 0.4347861002803582 0.7486919174128017 T T T  
0.9166667528651971 0.7499997517191233 0.2412107666657235 F F F  
0.9166667528651971 0.7499997517191233 0.3739663535723068 F F F  
0.7499997517191233 0.9166667528651971 0.3605224726145337 F F F

0.9192691649912104 0.7554649487935949 0.5028573835186747 T T T  
0.7499997517191233 0.9166667528651971 0.4932780595211170 F F F  
0.9093513419232337 0.7492259017079039 0.6303119732209773 T T T  
0.7252357130390022 0.9089943681429273 0.6202237143634334 T T T  
0.5723509814578249 0.8282157613370303 0.7506851452635762 T T T  
0.2052267436930401 0.1812242427763155 0.8058224738272766 T T T  
0.4166667494269589 0.2499997482808780 0.2701955255983037 F F F  
0.2499997482808780 0.4166667494269589 0.3315377136819535 F F F  
0.4166667494269589 0.2499997482808780 0.4029511125048870 F F F  
0.2499997482808780 0.4166667494269589 0.4642933005885368 F F F  
0.4134403374600283 0.2507272754579561 0.5308181104757138 T T T  
0.2499128372326178 0.4176406776472771 0.5917319592547828 T T T  
0.5048609903241885 0.2993934839257176 0.6540314603632584 T T T  
0.4166667494269589 0.7499997517191233 0.2701955255983037 F F F  
0.2499997482808780 0.9166667528651971 0.3315377136819535 F F F  
0.4166667494269589 0.7499997517191233 0.4029511125048870 F F F  
0.2499997482808780 0.9166667528651971 0.4642933005885368 F F F  
0.4167011405943420 0.7515865660036222 0.5315662627579627 T T T  
0.2506807513820914 0.9210311404339242 0.5917179751902537 T T T  
0.3877366363899533 0.7374356638743028 0.6599099850772447 T T T  
0.2243823280773705 0.9122027549431920 0.7186701901740739 T T T  
0.9166667528651971 0.2499997482808780 0.2701955255983037 F F F  
0.7499997517191233 0.4166667494269589 0.3315377136819535 F F F  
0.9166667528651971 0.2499997482808780 0.4029511125048870 F F F  
0.7499997517191233 0.4166667494269589 0.4642933005885368 F F F  
0.9176931966869013 0.2512336844089492 0.5312492390159582 T T T

|                    |                    |                    |   |   |   |
|--------------------|--------------------|--------------------|---|---|---|
| 0.7524496033352728 | 0.4198012574406408 | 0.5901940432523858 | T | T | T |
| 0.9103560733616248 | 0.2568032207689575 | 0.6608548272361324 | T | T | T |
| 0.7469151448080905 | 0.4239814773970640 | 0.7203631057707337 | T | T | T |
| 0.9166667528651971 | 0.7499997517191233 | 0.2701955255983037 | F | F | F |
| 0.7499997517191233 | 0.9166667528651971 | 0.3315377136819535 | F | F | F |
| 0.9166667528651971 | 0.7499997517191233 | 0.4029511125048870 | F | F | F |
| 0.7499997517191233 | 0.9166667528651971 | 0.4642933005885368 | F | F | F |
| 0.9176651590952505 | 0.7543926553779173 | 0.5313578748596339 | T | T | T |
| 0.7454144202870168 | 0.9170441659529284 | 0.5919998401686893 | T | T | T |
| 0.9098488230149911 | 0.7445444598488373 | 0.6590069973143109 | T | T | T |
| 0.6607511201640982 | 0.8763839560264783 | 0.7258848559118461 | T | T | T |
| 0.2191272217109767 | 0.4017637895860031 | 0.7211797161196326 | T | T | T |
| 0.2244664974517652 | 0.3806851224612968 | 0.7614084942367831 | T | T | T |
| 0.2122180975423951 | 0.1820569183647570 | 0.7758388456192123 | T | T | T |
| 0.2531747102628950 | 0.5692377015771020 | 0.7818168602033717 | T | T | T |
